# Supplementary material
Source: MDPI journal article supplement (https://www.mdpi.com/2072-4292/14/11/2620)
Supplement: s1 [file s1]

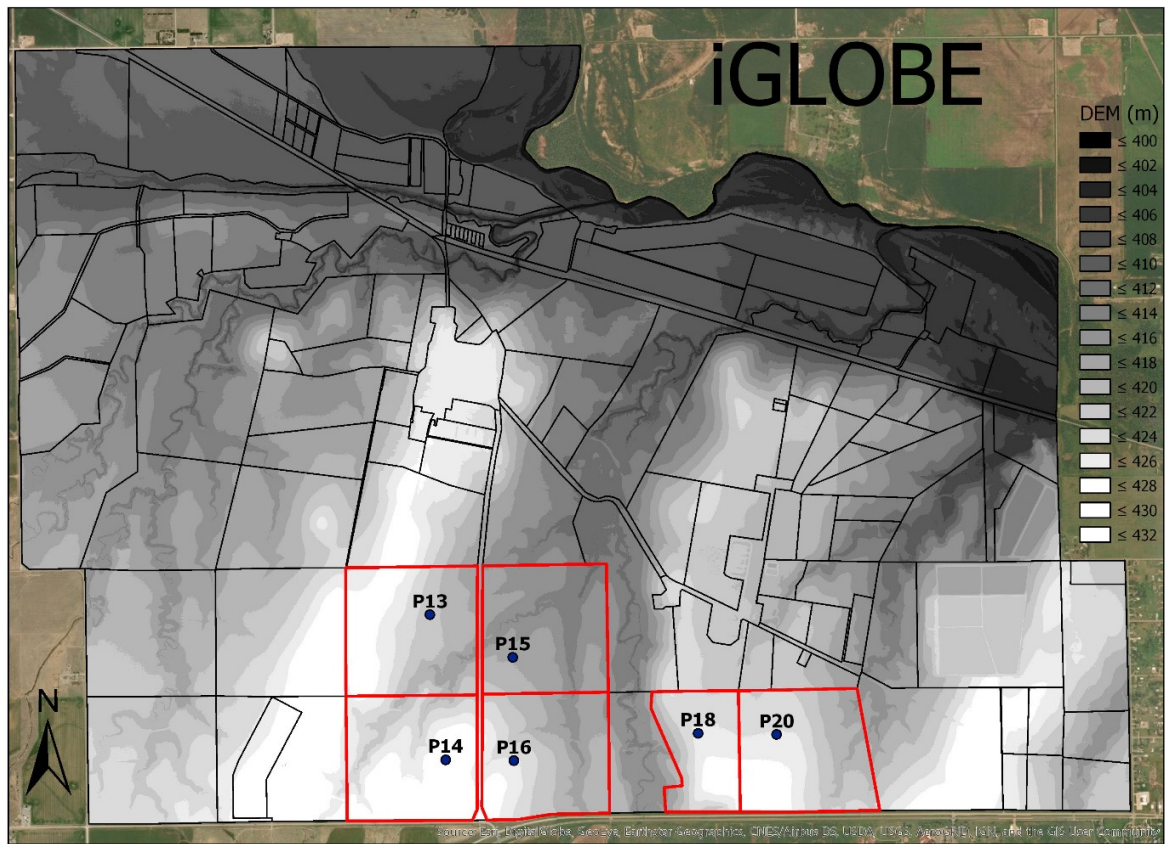

**Figure S1.** The experimental layout of the studied pastures. Blue dots represent the location of eddy covariance towers.
